# Supplementary material for: The use of solvent-soaking treatment to enhance the anisotropic mechanical properties of electrospun nanofiber membranes for water filtration
Source: Royal Society of Chemistry journal article supplement (doi:10.1039/c6ra11020g), 2016-01-01
Supplement: c6ra11020g1.pdf [file c6ra11020g1.pdf]

# Supporting Information

The use of solvent-soaking treatment to enhance the anisotropic mechanical properties of electrospun nanofiber membranes for water filtration

Jie Cai,<sup>a,b\*</sup> Qian Zhang,<sup>a</sup> Miao Lei,<sup>a</sup> Jingren He,<sup>a</sup> Gang Liu,<sup>a\*</sup>

<sup>a</sup> *College of Food Science and Engineering, Wuhan Polytechnic University, Wuhan 430023, PR China*

<sup>b</sup> *College of Food Science and Technology, Huazhong Agricultural University, Wuhan 430070, PR China*

\*Corresponding authors at: College of Food Science and Engineering, Wuhan Polytechnic University, Wuhan 430023, PR China

*E-mail:* [caijievip@hotmail.com](mailto:caijievip@hotmail.com); [caijievip@whpu.edu.cn](mailto:caijievip@whpu.edu.cn) (Dr. Jie Cai); [lg820823@163.com](mailto:lg820823@163.com) (Dr. Gang Liu)

**Table S1** Assignments of main infrared absorption bands in cellulosic materials

| Wave number (cm <sup>-1</sup> ) |      | Assignment                                               |
|---------------------------------|------|----------------------------------------------------------|
| BC                              | B-CA |                                                          |
| 3332                            | 3490 | OH stretching                                            |
|                                 | 2952 | CH stretching of CH <sub>2</sub>                         |
| 2901                            | 2901 |                                                          |
| 1734                            |      | C=O stretching of acetyl or carboxylic acid              |
|                                 | 1745 | C-O stretching of ester                                  |
|                                 |      | H-O-H bending of absorbed water and/or C=O stretching    |
| 1641                            |      | amid                                                     |
|                                 | 1639 | H-O-H bending of absorbed water                          |
| 1423                            | 1435 | CH <sub>2</sub> bending or OH in plane bending           |
| 1368                            | 1372 | C-H deformation (CH <sub>3</sub> or OH in plane bending) |
|                                 | 1236 | C-O stretching of acetyl group                           |
| 1162                            | 1165 | C-O-C antisymmetric bridge stretching                    |
| 1024                            | 1037 | C-O-C symmetric stretching of primary alcohol            |
| 883                             | 902  | β glucosidic linkages between the sugar units            |

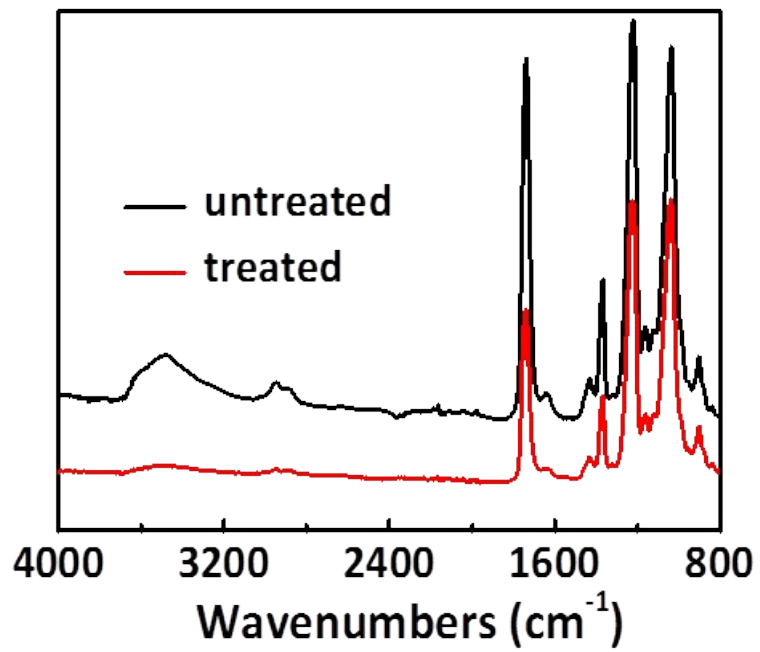

**Figure S1** ATR-FTIR spectrum of B-CA NFMs (treated and untreated)
